# Supplementary material for: Hierarchical macroporous/mesoporous NiCo2O4nanosheets as cathode catalysts for rechargeable Li–O2batteries
Source: Royal Society of Chemistry journal article supplement (doi:10.1039/c4ta01888e), 2014-05-28
Supplement: c4ta01888e1.pdf [file c4ta01888e1.pdf]

## Hierarchical macroporous/mesoporous $\text{NiCo}_2\text{O}_4$ nanosheets as cathode catalysts for rechargeable $\text{Li-O}_2$ batteries

Bing Sun,<sup>\*a</sup> Xiaodan Huang,<sup>a</sup> Shuangqiang Chen,<sup>a</sup> Yufei Zhao,<sup>a</sup> Jinqiang Zhang,<sup>a</sup> Paul

Munroe<sup>b</sup> and Guoxiu Wang<sup>\*a</sup>

<sup>a</sup> Centre for Clean Energy Technology, School of Chemistry and Forensic Science, University of Technology Sydney, Broadway, Sydney, NSW 2007, Australia.

<sup>b</sup> Electron Microscope Unit, The University of New South Wales, Sydney, NSW 2052, Australia

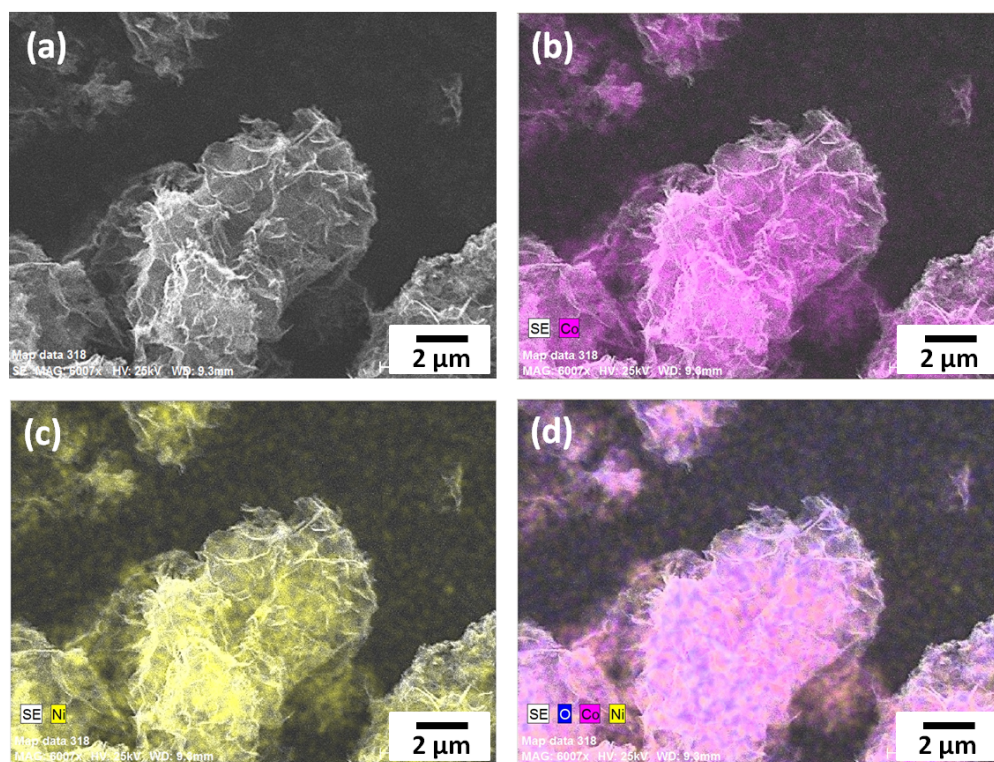

**Fig. S1** SEM elemental mapping images of NCO nanosheets.

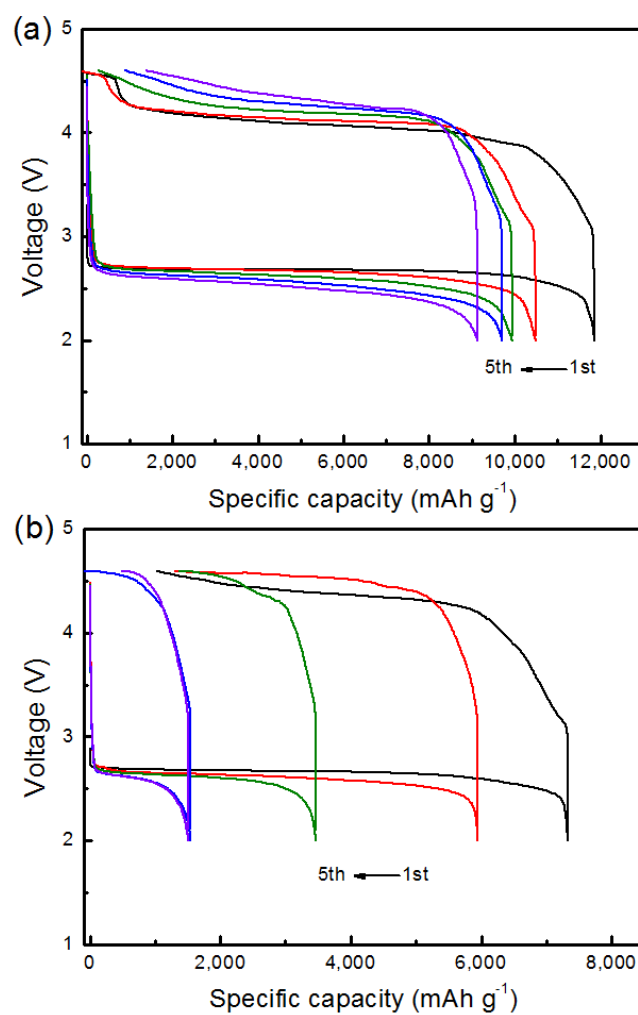

**Fig. S2** First five cycle charge/discharge voltage curves of NCO electrode (a) and CB electrode (b) at the current density of 200 mA g<sup>-1</sup> in the voltage range of 2.0 - 4.6 V.

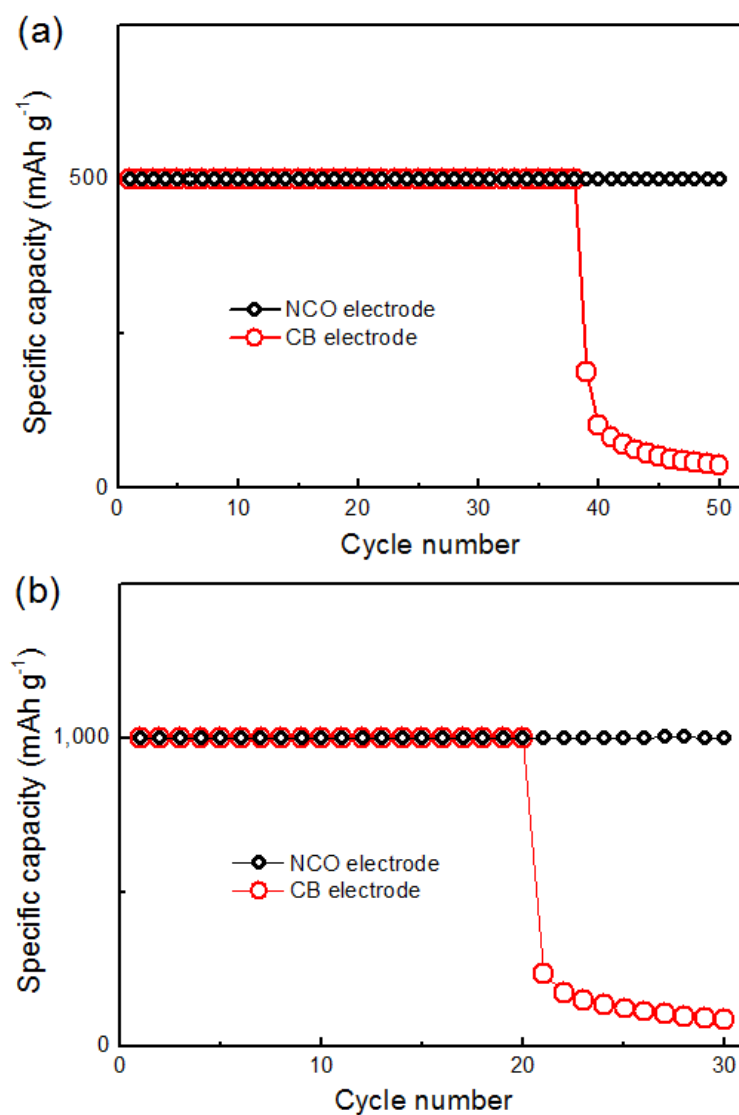

**Fig. S3** Specific capacity vs. cycle number of Li-O<sub>2</sub> batteries with NCO nanosheets and CB catalysts at the current density of 200 mA g<sup>-1</sup>: (a) curtailing the capacity to 500 mA h g<sup>-1</sup>, (b) curtailing the capacity to 1000 mA h g<sup>-1</sup>.

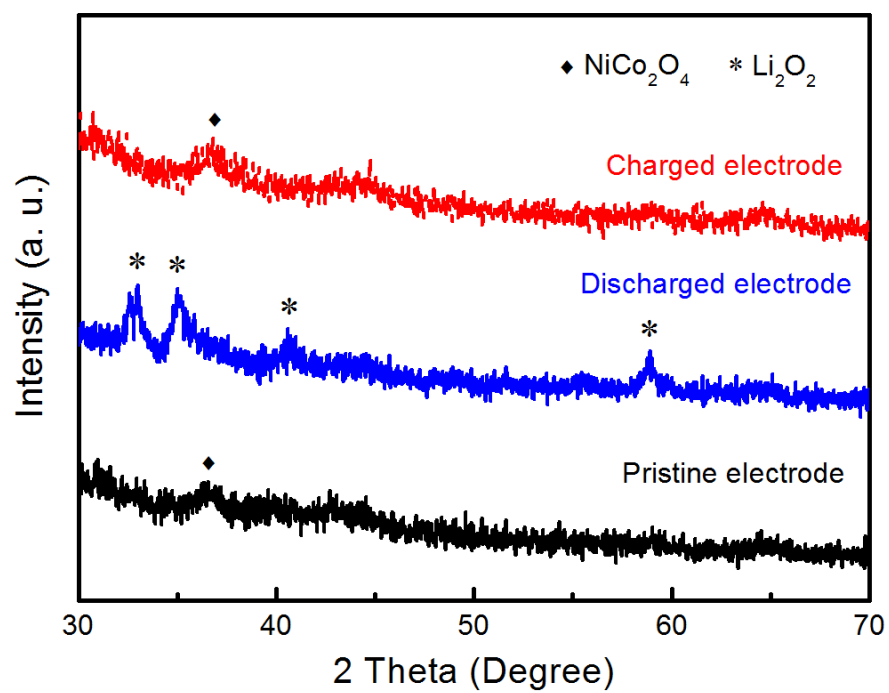

**Fig. S4** XRD patterns of NCO electrodes before discharge, after discharge and recharge.

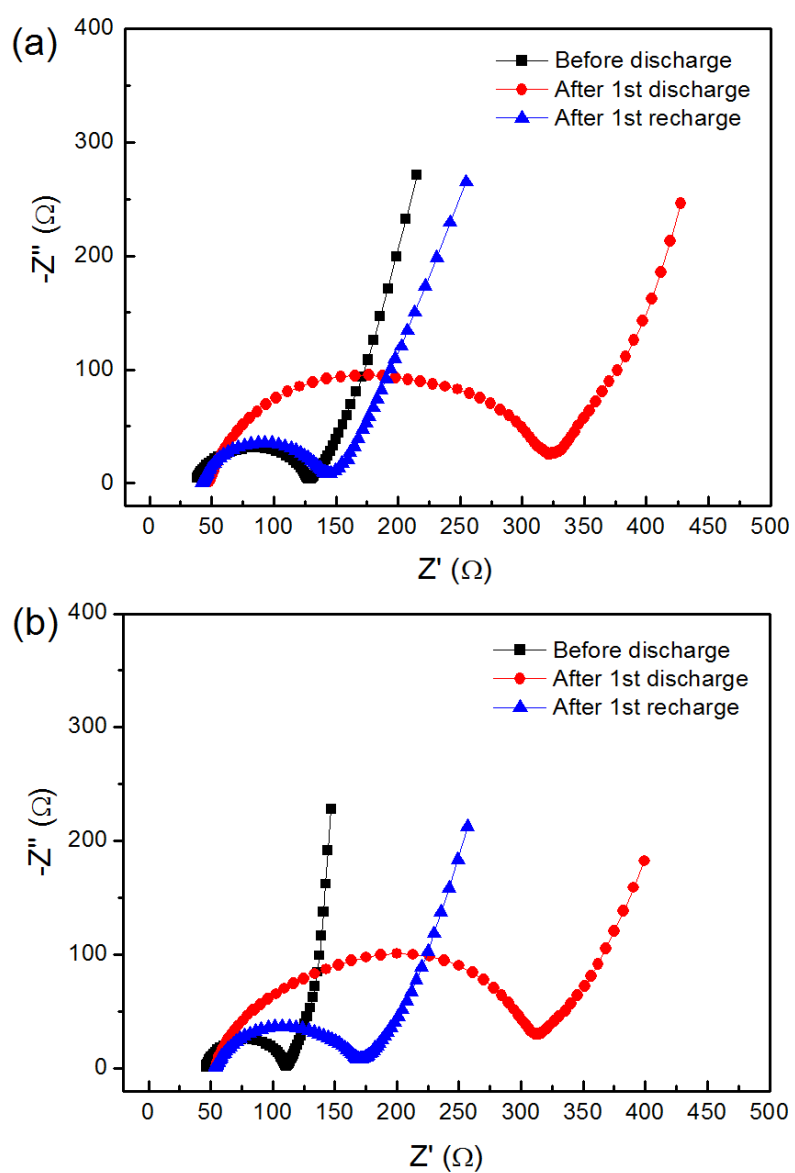

**Fig. S5** Electrochemical impedance spectra of (a) NCO and (b) CB electrodes at different charge/discharge states.
